# Supplementary material
Source: publisher figshare collection journal article supplement (https://tandf.figshare.com/ndownloader/files/14617829)
Supplement: Supplementary file 1 [file 14617829]

**Supplement 1.** Search strategies

| **Search** | **Query** |
| --- | --- |
| **PubMed** | ("Air Ambulances"[Mesh] OR Air Ambulance*[tiab] OR Helicopter*[tiab] OR P-HEMS [tiab] OR PHEMS[tiab] OR HEMS[tiab] OR EAMT[tiab] OR critical care team*[tiab] OR aeromedical[tiab] OR pre-hospital[tiab] OR prehospital[tiab] OR air transport*[tiab] OR Mobile Medical Team[tiab] OR airlifted[tiab]) AND ("Brain Injuries, Traumatic"[Mesh] OR Traumatic Brain Injur*[tiab] OR Brain Trauma*[tiab] OR TBI*[tiab] OR Traumatic Encephalopath*[tiab] OR Brain injur*[tiab] OR head injur*[tiab] OR head trauma*[tiab] OR head contusion*[tiab] OR head concussion*[tiab] OR neurologic injur*[tiab] OR neurological injur*[tiab] OR brain contusion*[tiab] OR brain concussion*[tiab] OR craniocerebral trauma*[tiab] OR neurotrauma*[tiab] OR cerebrovascular trauma*[tiab] OR Commotio Cerebri[tiab] OR Cerebral Concussion*[tiab] OR Severe Concussion*[tiab] OR Contusio Cerebri[tiab] OR Cerebellar Contusion*[tiab] OR Cerebral Contusion*[tiab] OR Cortical Contusion*[tiab] OR brain lesion*[tiab] OR cerebral trauma*[tiab] OR traumatic brain lesion*[tiab] OR traumatic cerebral lesion[tiab]) |
| **Embase.com** | ('air medical transport'/exp OR 'air ambulance*':ti,ab OR helicopter*:ti,ab OR 'p-hems':ti,ab OR phems:ti,ab OR hems:ti,ab OR eamt:ti,ab OR 'critical care team*':ti,ab OR aeromedical:ti,ab OR 'pre-hospital':ti,ab OR prehospital:ti,ab OR 'air transport*':ti,ab OR 'mobile medical team':ti,ab OR airlifted:ti,ab OR 'ambulance aircraft*':ti,ab) AND ('traumatic brain injury'/exp OR 'traumatic brain injur*':ti,ab OR 'brain trauma*':ti,ab OR tbi*:ti,ab OR 'traumatic encephalopath*':ti,ab OR 'brain injur*':ti,ab OR 'head injur*':ti,ab OR 'head trauma*':ti,ab OR 'head contusion*':ti,ab OR 'head concussion*':ti,ab OR 'neurologic injur*':ti,ab OR 'neurological injur*':ti,ab OR 'brain contusion*':ti,ab OR 'brain concussion*':ti,ab OR 'craniocerebral trauma*':ti,ab OR neurotrauma*:ti,ab OR 'cerebrovascular trauma*':ti,ab OR 'commotio cerebri':ti,ab OR 'cerebral concussion*':ti,ab OR 'severe concussion*':ti,ab OR 'contusio cerebri':ti,ab OR 'cerebellar contusion*':ti,ab OR 'cerebral contusion*':ti,ab OR 'cortical contusion*':ti,ab OR 'brain lesion*':ti,ab OR 'cerebral trauma*':ti,ab OR 'traumatic brain lesion*':ti,ab OR 'traumatic cerebral lesion':ti,ab) |
| **The Cochrane Library** | (Air Ambulance* or Helicopter* or P-HEMS or PHEMS or HEMS or EAMT or critical care team* or aeromedical or pre-hospital or prehospital or air transport* or Mobile Medical Team* or airlifted or ambulance aircraft*:ti,ab,kw) AND Traumatic Brain Injur* or Brain Trauma* or TBI* or Traumatic Encephalopath* or Brain injur* or head injur* or head trauma* or head contusion* or head concussion* or neurologic injur* or neurological injur* or brain contusion* or brain concussion* or craniocerebral trauma* or neurotrauma* or cerebrovascular trauma* or Commotio Cerebri or Cerebral Concussion* or Severe Concussion* or Contusio Cerebri or Cerebellar Contusion* or Cerebral Contusion* or Cortical Contusion* or brain lesion* or cerebral trauma* or traumatic brain lesion* or traumatic cerebral lesion*:ti,ab,kw) (Word variations have been searched) |
